# Supplementary material
Source: PubMed Central journal article supplement (PMC3766186)
Supplement: supp_ddt251_ddt251supp.pdf [file supp_ddt251_ddt251supp.pdf]

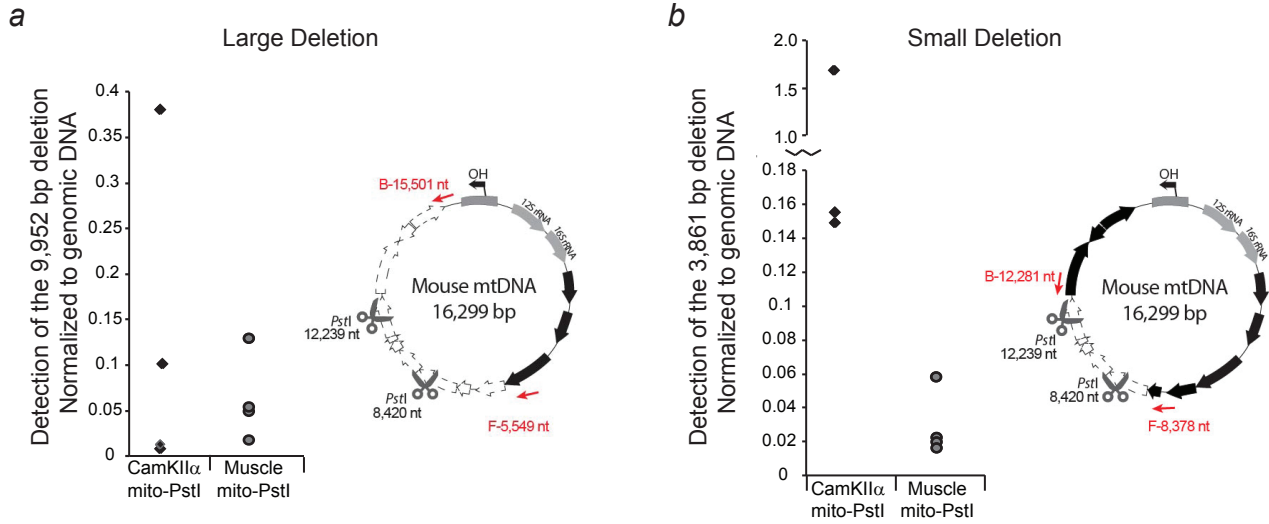

**Supplementary figure S1. Systemic *mito-PstI* mice have low levels of mtDNA deletions.** *a-b*, Relative quantification of large (*a*) and small (*b*) deletions by quantitative PCR in skeletal muscle of the systemic *mito-PstI* mice at 6 months of age, compared to levels in our previously reported CamKII $\alpha$ -promoter induction model. Systemic *mito-PstI* muscle harbored detectable deletion loads, but not at levels higher than those estimated to be 1%. Each symbol represents one animal. Red arrows indicate the primers used during qPCR.

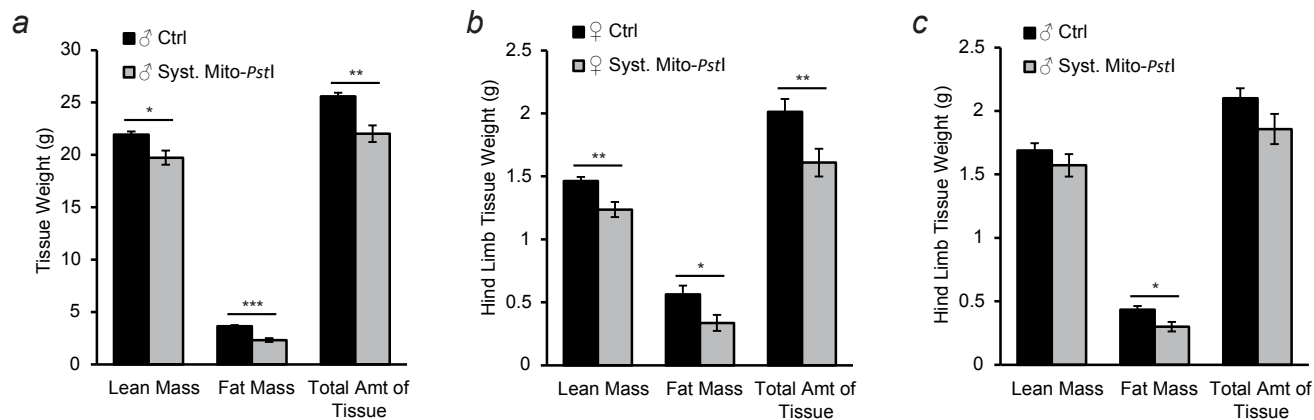

Supplementary Figure S2. Tissue loss characterized in systemic mito-*Pstl* mice. **a**, DEXA scan quantification (grams) of lean mass, fat mass, and total amount of tissue from 6 months old control and systemic mito-*Pstl* male mice (n=7~12 per group). **b-c**, DEXA scan quantification (grams) of lean mass, fat mass, and total amount of tissue in the hind limb of 6 months old control and systemic mito-*Pstl* (**b**) female and (**c**) male mice (n=7~12 per group).

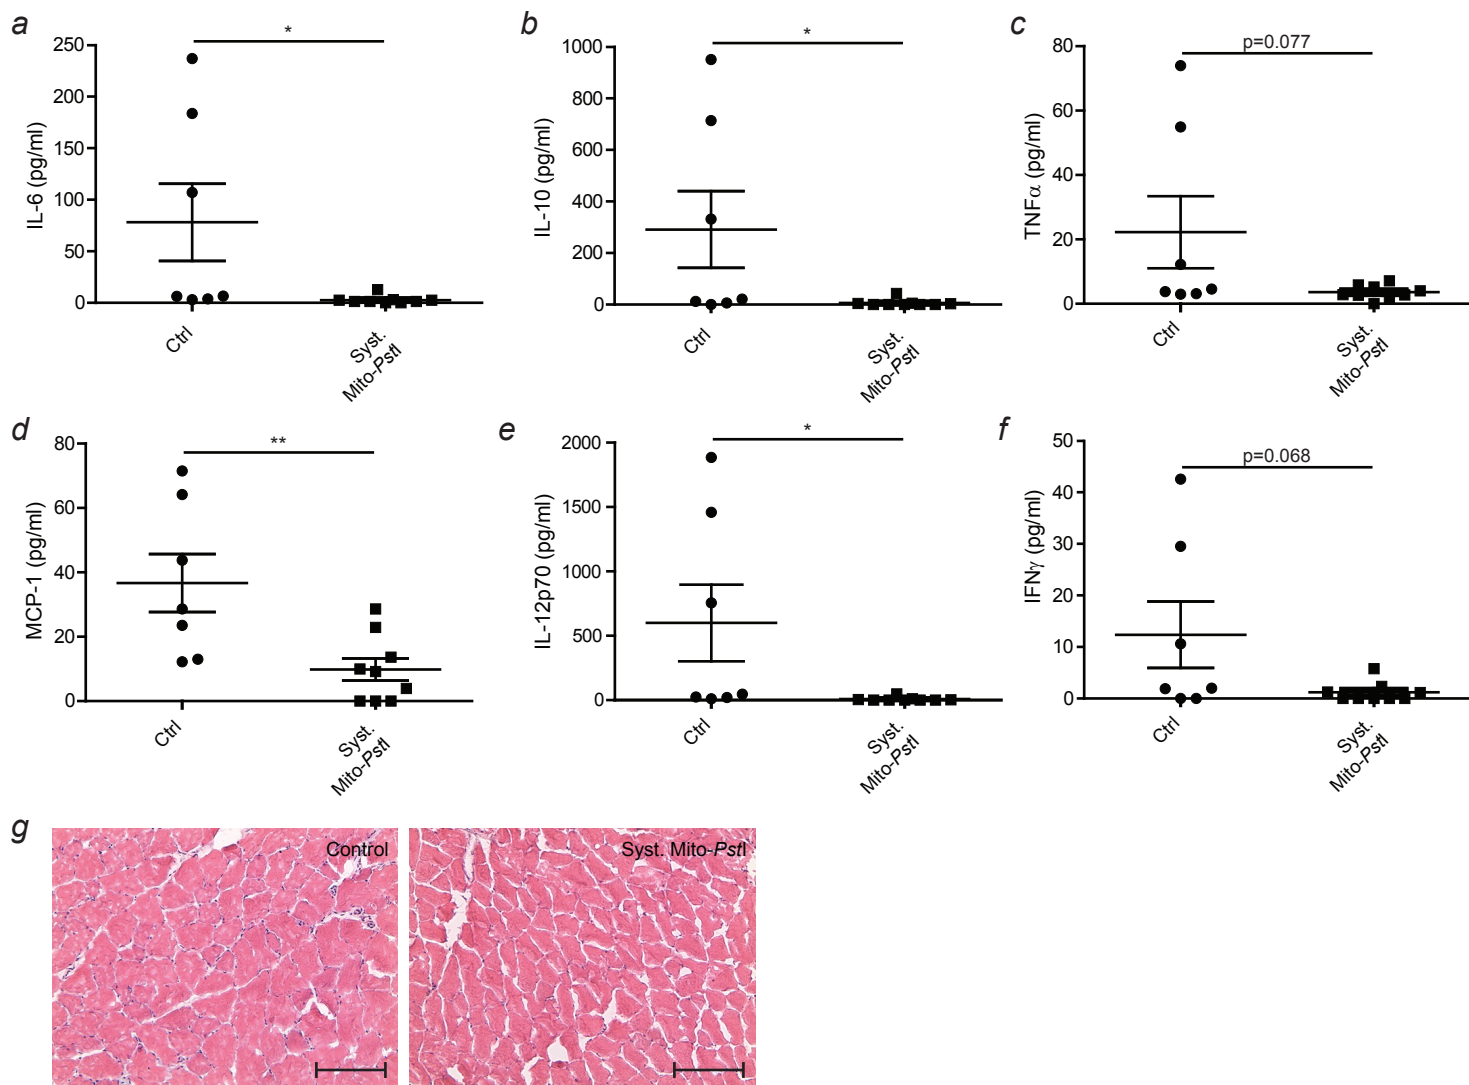

Supplementary Figure S3. Inflammatory cytokine levels in serum and histological staining of skeletal muscle from 6 month old mice. a-f, The cytokines (a-f, IL-12p70, TNF $\alpha$ , IFN $\gamma$ , MCP-1, IL-10, IL-6) were measured using a BD Cytometric Bead Array Mouse Inflammation Kit, and data was analyzed using FCAP Array software. n=7 for Ctrl, and n=9 for Systemic Mito-Pstl. g, Representative H&E staining of quadriceps muscle from 6 months old mice. Data was presented as Mean $\pm$ SEM (\* = p<.05, \*\* = p<.01, \*\*\* = p<.001).

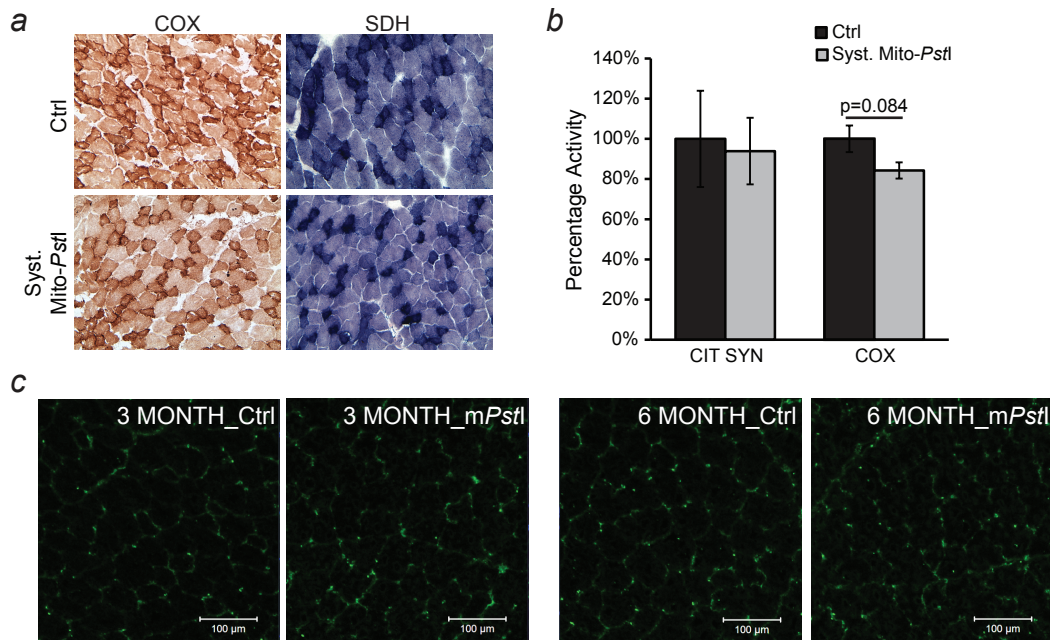

Supplementary Figure S4. Enzyme activity assay in skeletal muscle of 6 months old mice. a, Representative images of COX and Succinate dehydrogenase (SDH) activity staining of 6 months old control and systemic mito-*Pstl* mice (n=3 per group). b, Citrate synthase (CIT SYN) and Cytochrome c oxidase (COX) activity in quadriceps of 6 months old control and systemic mito-*Pstl* mice (n=5 per group). c, Immunohistochemical staining of 8-OHG/8-OHdG in frozen muscle sections from 3 and 6 months old control or systemic mito-*Pstl* mice (n=3 per group). Values are presented as mean  $\pm$  SEM (\* =  $p < .05$ , \*\* =  $p < .01$ , \*\*\* =  $p < .001$ ).
